# Supplementary material for: Clinical Characteristics and Outcomes of Cancer Cases Among Syrian Refugees From Southern Turkey
Source: PubMed Central journal article supplement (PMC10208156; doi:10.1001/jamanetworkopen.2023.12903), 2023-05-23

## Supplementary Online Content

Kutluk T, Şahin B, Kirazlı M, et al. Clinical characteristics and outcomes of cancer cases among Syrian refugees from southern Turkey. *JAMA Netw Open*. 2023;6(5):e2312903. doi:10.1001/jamanetworkopen.2023.12903

**eTable 1.** Characteristics of Syrian Refugee Patients With Cancer

**eTable 2.** Locations of Malignancy by Age and Sex Among Syrian Adult Refugee Patients With Cancer

**eTable 3.** Stage by Cancer Topography in Codes for Adult Syrian Refugee Patients With Cancer

**eTable 4.** Treatment Modalities for Adult Syrian Refugee Patients With Cancer

**eTable 5.** Distribution of Cancer Types Among Males and Females

**eTable 6.** Tumor Staging in Syrian Refugee Children With Cancer

**eTable 7.** Treatment Modalities for Syrian Refugee Children With Cancer

**eTable 8.** A Brief History of Legal Arrangements for Providing Health Care to Refugees in Turkey

**eFigure 1.** The Participating Centers From Eight Cities in Southern Turkey

**eFigure 2.** The Phase-Specific Health-Related Risks & Problems of Forced Migration

This supplementary material has been provided by the authors to give readers additional information about their work.

**eTable 1. Characteristics of Syrian Refugee Patients with Cancer**

| Characteristics                                         | Adult      |             |            |             |             |              | Children   |             |            |             |            |              |  |
|---------------------------------------------------------|------------|-------------|------------|-------------|-------------|--------------|------------|-------------|------------|-------------|------------|--------------|--|
|                                                         | Male       |             | Female     |             | Total       |              | Boys       |             | Girls      |             | Total      |              |  |
|                                                         | n          | %           | n          | %           | n           | %            | n          | %           | n          | %           | n          | %            |  |
| <b>Country of first diagnosis</b>                       |            |             |            |             |             |              |            |             |            |             |            |              |  |
| Turkey                                                  | 524        | 84.4        | 409        | 83.0        | 933         | 83.8         | 224        | 85.5        | 143        | 89.9        | 367        | 87.2         |  |
| Syria                                                   | 93         | 15.0        | 82         | 16.6        | 175         | 15.7         | 37         | 14.1        | 16         | 10.1        | 53         | 12.6         |  |
| Other <sup>a</sup>                                      | 4          | 0.6         | 2          | 0.4         | 6           | 0.5          | 1          | 0.4         | NA         | 0           | 1          | 0.2          |  |
| <b>Country of residence during the last three years</b> |            |             |            |             |             |              |            |             |            |             |            |              |  |
| Turkey                                                  | 202        | 32.5        | 166        | 33.7        | 368         | 33.0         | 164        | 62.6        | 109        | 68.6        | 273        | 64.8         |  |
| Syria                                                   | 169        | 27.2        | 128        | 26.0        | 297         | 26.7         | 85         | 32.4        | 43         | 27.0        | 128        | 30.4         |  |
| Missing Data                                            | 250        | 40.3        | 199        | 40.4        | 449         | 40.3         | 13         | 5.0         | 7          | 4.4         | 20         | 4.8          |  |
| <b>Country of residence during treatment</b>            |            |             |            |             |             |              |            |             |            |             |            |              |  |
| Turkey                                                  | 352        | 56.7        | 297        | 60.2        | 649         | 58.3         | 199        | 76.0        | 129        | 81.1        | 328        | 77.9         |  |
| Syria <sup>b</sup>                                      | 51         | 8.2         | 17         | 3.4         | 68          | 6.1          | 52         | 19.8        | 23         | 14.5        | 75         | 17.8         |  |
| Missing Data                                            | 218        | 35.1        | 179        | 36.3        | 397         | 35.6         | 11         | 4.2         | 7          | 4.4         | 18         | 4.3          |  |
| <b>Smoking</b>                                          |            |             |            |             |             |              |            |             |            |             |            |              |  |
| Yes                                                     | 170        | 27.4        | 13         | 2.6         | 183         | 16.4         | NA         | NA          | NA         | NA          | NA         | NA           |  |
| No                                                      | 135        | 21.7        | 286        | 58.0        | 421         | 37.8         | NA         | NA          | NA         | NA          | NA         | NA           |  |
| Missing Data                                            | 316        | 50.9        | 194        | 39.4        | 510         | 45.8         | NA         | NA          | NA         | NA          | NA         | NA           |  |
| <b>Total</b>                                            | <b>621</b> | <b>55.7</b> | <b>493</b> | <b>44.3</b> | <b>1114</b> | <b>100.0</b> | <b>262</b> | <b>62.2</b> | <b>159</b> | <b>37.8</b> | <b>421</b> | <b>100.0</b> |  |

<sup>a</sup> Five adults and one child were diagnosed in neighbouring countries and one adult was diagnosed in Belgium

<sup>b</sup> Visiting Turkey just for treatment and returning back to Syria while holding refugee status (Visiting Refugee)

**eTable 2. Locations of Malignancy by Age and Sex Among Syrian Adult Refugee Patients with Cancer**

| Site                                                           | Male       |               |              |              | Female     |               |              |              | M/F                 | Total       |               |              |              |
|----------------------------------------------------------------|------------|---------------|--------------|--------------|------------|---------------|--------------|--------------|---------------------|-------------|---------------|--------------|--------------|
|                                                                | n          | %             | Mean age     | SD           | n          | %             | Mean Age     | SD           |                     | n           | %             | Mean Age     | SD           |
| C00-C14 Lip, Oral Cavity and Pharynx                           | 21         | 3.38          | 51.37        | 18.36        | 10         | 2.03          | 45.00        | 14.76        | 21:10=2.1           | 31          | 2.78          | 49.32        | 17.30        |
| C15-C26 Digestive Organs                                       | 100        | 16.10         | 52.38        | 14.65        | 50         | 10.14         | 50.40        | 15.61        | 100:50=2            | 150         | 13.46         | 51.72        | 14.95        |
| C30-C39 Respiratory System and Intrathoracic Organs            | 120        | 19.32         | 57.25        | 12.46        | 21         | 4.26          | 50.37        | 14.67        | 120:21=5.71         | 141         | 12.66         | 56.23        | 12.99        |
| C40-C41 Bones, Joints and Articular Cartilage                  | 23         | 3.70          | 31.76        | 13.09        | 11         | 2.23          | 39.64        | 18.06        | 23:11=2.09          | 34          | 3.05          | 34.31        | 15.07        |
| C42 Hematopoietic and Reticuloendothelial Systems              | 95         | 15.30         | 46.74        | 17.11        | 60         | 12.17         | 45.50        | 15.81        | 95:60=1.58          | 155         | 13.91         | 46.26        | 16.58        |
| C44 Skin                                                       | 27         | 4.35          | 50.12        | 15.04        | 10         | 2.03          | 63.32        | 14.96        | 27:10=2.7           | 37          | 3.32          | 53.68        | 15.95        |
| C47 Peripheral Nerves and Autonomic Nervous System             | 1          | 0.16          | 24.49        | NA           | NA         | NA            | NA           | NA           | NA                  | 1           | 0.09          | 24.49        | NA           |
| C48 Retroperitoneum and Peritoneum                             | 2          | 0.32          | 41.49        | 8.97         | 3          | 0.61          | 54.78        | 5.85         | 2:3=0.67            | 5           | 0.45          | 49.46        | 9.50         |
| C49 Connective, Subcutaneous and Other Soft Tissues            | 32         | 5.15          | 37.44        | 17.29        | 15         | 3.04          | 44.52        | 20.24        | 32:15=2.13          | 47          | 4.22          | 39.70        | 18.37        |
| C50 Breast                                                     | 6          | 0.97          | 52.36        | 19.62        | 148        | 30.02         | 47.31        | 11.82        | 6:148=0.04          | 154         | 13.82         | 47.51        | 12.15        |
| C51-C58 Female Genital Organs                                  | NA         | NA            | NA           | NA           | 77         | 15.62         | 47.40        | 14.49        | NA                  | 77          | 6.91          | 47.40        | 14.49        |
| C60-C63 Male Genital Organs                                    | 40         | 6.44          | 42.96        | 18.86        | NA         | NA            | NA           | NA           | NA                  | 40          | 3.59          | 42.96        | 18.86        |
| C64-C68 Urinary Tract                                          | 36         | 5.80          | 57.30        | 12.47        | 7          | 1.42          | 54.57        | 12.68        | 36:7=5.14           | 43          | 3.86          | 56.85        | 12.40        |
| C69-C72 Eye, Brain, and Others Parts Of Central Nervous System | 25         | 4.03          | 44.36        | 14.57        | 12         | 2.43          | 38.62        | 18.26        | 25:12=2.08          | 37          | 3.32          | 42.50        | 15.83        |
| C73-C75 Thyroid and Other Endocrine Glands                     | 3          | 0.48          | 35.36        | 6.90         | 12         | 2.43          | 47.38        | 15.59        | 3:12=0.25           | 15          | 1.35          | 44.98        | 14.92        |
| C76 Other and Ill-Defined Sites                                | NA         | NA            | NA           | NA           | 1          | 0.20          | 57.48        | NA           | NA                  | 1           | 0.09          | 57.48        | NA           |
| C77 Lymph Nodes                                                | 87         | 14.01         | 37.52        | 15.59        | 52         | 10.55         | 36.70        | 16.86        | 87:52=1.67          | 139         | 12.48         | 37.21        | 16.02        |
| C80 Unknown Primary Site                                       | 3          | 0.48          | 47.21        | 17.64        | 4          | 0.81          | 58.05        | 25.13        | 3:4=0.75            | 7           | 0.63          | 53.40        | 21.28        |
| <b>Total</b>                                                   | <b>621</b> | <b>100.00</b> | <b>47.88</b> | <b>16.97</b> | <b>493</b> | <b>100.00</b> | <b>46.50</b> | <b>15.35</b> | <b>621:493=1.26</b> | <b>1114</b> | <b>100.00</b> | <b>47.27</b> | <b>16.28</b> |

**eTable 3. Stage by Cancer Topography in Codes for Adult Syrian Refugee Patients with Cancer**

| Topography                                                     | Local<br>(SEER 0-1) |             | Regional<br>(SEER 2-5) |             | Metastatic<br>(SEER 7) |             | Unknown<br>(SEER 9) |            | Total       |              |
|----------------------------------------------------------------|---------------------|-------------|------------------------|-------------|------------------------|-------------|---------------------|------------|-------------|--------------|
|                                                                | n                   | %           | n                      | %           | n                      | %           | n                   | %          | n           | %            |
| C00-C14 Lip, Oral Cavity and Pharynx                           | 5                   | 16.1        | 15                     | 48.4        | 9                      | 29.0        | 2                   | 6.5        | 31          | 100.0        |
| C15-C26 Digestive Organs                                       | 10                  | 6.7         | 31                     | 20.7        | 102                    | 68.0        | 7                   | 4.7        | 150         | 100.0        |
| C30-C39 Respiratory System and Intrathoracic Organs            | 10                  | 7.1         | 46                     | 32.6        | 77                     | 54.6        | 8                   | 5.7        | 141         | 100.0        |
| C40-C41 Bones, Joints and Articular Cartilage                  | 4                   | 11.8        | 13                     | 38.2        | 14                     | 41.2        | 3                   | 8.8        | 34          | 100.0        |
| C42 Hematopoietic and Reticuloendothelial Systems              | NA                  | NA          | NA                     | 0           | 155                    | 100.0       | NA                  | 0          | 155         | 100.0        |
| C44 Skin                                                       | 18                  | 48.6        | 9                      | 24.3        | 7                      | 18.9        | 3                   | 8.1        | 37          | 100.0        |
| C47 Peripheral Nerves and Autonomic Nervous System             | NA                  | 0           | NA                     | 0           | 1                      | 100.0       | NA                  | 0          | 1           | 100.0        |
| C48 Retroperitoneum and Peritoneum                             | NA                  | 0           | 1                      | 20.0        | 4                      | 80.0        | NA                  | 0          | 5           | 100.0        |
| C49 Connective, Subcutaneous and Other Soft Tissues            | 5                   | 10.6        | 9                      | 19.1        | 26                     | 55.3        | 7                   | 14.9       | 47          | 100.0        |
| C50 Breast                                                     | 21                  | 13.6        | 55                     | 35.7        | 56                     | 36.4        | 22                  | 14.3       | 154         | 100.0        |
| C51-C58 Female Genital Organs                                  | 18                  | 23.4        | 20                     | 26.0        | 34                     | 44.2        | 5                   | 6.5        | 77          | 100.0        |
| C60-C63 Male Genital Organs                                    | 13                  | 32.5        | 6                      | 15.0        | 21                     | 52.5        | NA                  | 0          | 40          | 100.0        |
| C64-C68 Urinary Tract                                          | 13                  | 30.2        | 7                      | 16.3        | 23                     | 53.5        | NA                  | 0          | 43          | 100.0        |
| C69-C72 Eye, Brain, and Others Parts Of Central Nervous System | 16                  | 43.2        | 2                      | 5.4         | 11                     | 29.7        | 8                   | 21.6       | 37          | 100.0        |
| C73-C75 Thyroid and Other Endocrine Glands                     | 10                  | 66.7        | 1                      | 6.7         | 3                      | 20.0        | 1                   | 6.7        | 15          | 100.0        |
| C76 Other and Ill-Defined Sites                                | NA                  | 0           | NA                     | 0           | 1                      | 100.0       | NA                  | 0          | 1           | 100.0        |
| C77 Lymph Nodes                                                | 11                  | 7.9         | 17                     | 12.2        | 104                    | 74.8        | 7                   | 5.0        | 139         | 100.0        |
| C80 Unknown Primary Site                                       | NA                  | 0           | 1                      | 14.3        | 6                      | 85.7        | NA                  | 0          | 7           | 100.0        |
| <b>Total</b>                                                   | <b>154</b>          | <b>13.8</b> | <b>233</b>             | <b>20.9</b> | <b>654</b>             | <b>58.7</b> | <b>73</b>           | <b>6.6</b> | <b>1114</b> | <b>100.0</b> |

**eTable 4. Treatment Modalities for Adult Syrian Refugee Patients with Cancer**

| <b>Type of Procedure</b>           |                              | <b>No of procedures/treatment</b> |
|------------------------------------|------------------------------|-----------------------------------|
| Chemotherapy (n=1139)              | Neoadjuvant                  | 214                               |
|                                    | Adjuvant                     | 372                               |
|                                    | Palliative                   | 358                               |
|                                    | Unknown                      | 195                               |
| Surgery (n=620)                    | Curative/ Partial resection  | 43                                |
|                                    | Curative/ Complete resection | 258                               |
|                                    | Biopsy                       | 248                               |
|                                    | Palliative                   | 61                                |
|                                    | Unknown                      | 10                                |
| Radiotherapy (n=256)               | Therapeutic                  | 166                               |
|                                    | Palliative                   | 79                                |
|                                    | Other                        | 11                                |
| Bone marrow transplantation (n=31) | Allogeneic                   | 2                                 |
|                                    | Autologous                   | 29                                |
| Solid Organ Trasplant (n=2)        | Liver, Kidney                | 2                                 |
| <b>Total number of procedures</b>  |                              | <b>2048</b>                       |

**eTable 5. Distribution of Cancer Types Among Males and Females**

| <b>Cancer types (males)</b>   | <b>n</b>   | <b>%</b>      | <b>Survival</b> | <b>Last Months</b> |
|-------------------------------|------------|---------------|-----------------|--------------------|
| Bronchus and Lung             | 94         | 15.14         | 2.0             | 57                 |
| Leukemia & Multiple Myeloma   | 91         | 14.65         | 10.1            | 60                 |
| Lymphoma                      | 89         | 14.33         | 24.2            | 60                 |
| Colorectal                    | 39         | 6.28          | 8.7             | 60                 |
| Bladder                       | 26         | 4.19          | 4.5             | 42                 |
| Testis                        | 24         | 3.86          | 43.2            | 60                 |
| Brain+Spinal Cord             | 21         | 3.38          | 14.0            | 60                 |
| Larynx                        | 20         | 3.22          | 8.0             | 48                 |
| Stomach                       | 17         | 2.74          | 15.3            | 18                 |
| Pancreas                      | 16         | 2.58          | 12.5            | 9                  |
| Others                        | 183        | 29.47         | 10.9            | 60                 |
| <b>Total</b>                  | <b>621</b> | <b>100.00</b> | <b>11.1</b>     | <b>60</b>          |
| <b>Cancer types (females)</b> |            |               |                 |                    |
| Breast                        | 148        | 30.02         | 37.8            | 60                 |
| Leukemia & Multiple Myeloma   | 56         | 11.36         | 40.5            | 60                 |
| Lymphoma                      | 52         | 10.55         | 27.0            | 60                 |
| Ovary                         | 32         | 6.49          | 15.7            | 60                 |
| Colorectal                    | 22         | 4.46          | 17.3            | 60                 |
| Servix uteri                  | 20         | 4.06          | 19.1            | 60                 |
| Other uterus                  | 17         | 3.45          | 12.0            | 27                 |
| Bronchus and Lung             | 12         | 2.43          | 9.2             | 40                 |
| Thyroid                       | 12         | 2.43          | 57.0            | 60                 |
| Brain+Spinal Cord             | 10         | 2.03          | 40.0            | 60                 |
| Others                        | 112        | 22.72         | 11.1            | 60                 |
| <b>Total</b>                  | <b>493</b> | <b>100.00</b> | <b>21.3</b>     | <b>60</b>          |

**eTable 6. Tumor Staging in Syrian Refugee Children With Cancer <sup>a</sup>**

| Morphology                                                                   | Local<br>( Stage I & II) |             | Advanced<br>(Stage III & IV) |             | Total      |              |
|------------------------------------------------------------------------------|--------------------------|-------------|------------------------------|-------------|------------|--------------|
|                                                                              | n                        | %           | n                            | %           | n          | %            |
| 02 Lymphomas and reticuloendothelial neoplasms                               | 26                       | 39.4        | 40                           | 60.6        | 66         | 100.0        |
| 03 CNS <sup>b</sup> and miscellaneous intracranial and intraspinal neoplasms | 39                       | 97.5        | 1                            | 2.5         | 40         | 100.0        |
| 04 Neuroblastoma and other peripheral nervous cell tumors                    | 2                        | 6.5         | 29                           | 93.5        | 31         | 100.0        |
| 05 Retinoblastoma                                                            | 2                        | 50.0        | 2                            | 50.0        | 4          | 100.0        |
| 06 Renal tumors                                                              | 9                        | 47.4        | 10                           | 52.6        | 19         | 100.0        |
| 07 Hepatic tumors                                                            | 2                        | 18.2        | 9                            | 81.8        | 11         | 100.0        |
| 08 Malignant bone tumors                                                     | 5                        | 26.3        | 14                           | 73.7        | 19         | 100.0        |
| 09 Soft tissue and other extraosseous sarcomas                               | 9                        | 31.0        | 20                           | 69.0        | 29         | 100.0        |
| 10 Germ cell tumors trophoblastic tumors and neoplasms of gonads             | 5                        | 45.5        | 6                            | 54.5        | 11         | 100.0        |
| 11 Other malignant epithelial neoplasms and malignant melanomas              | 3                        | 50.0        | 3                            | 50.0        | 6          | 100.0        |
| 12 Other and unspecified malignant neoplasms                                 | 2                        | 40.0        | 3                            | 60.0        | 5          | 100.0        |
| <b>Total</b>                                                                 | <b>104</b>               | <b>43.2</b> | <b>137</b>                   | <b>56.8</b> | <b>241</b> | <b>100.0</b> |

<sup>a</sup>Leukemias were not included in staging

<sup>b</sup>CNS: Central nervous system

**eTable 7. Treatment Modalities for Syrian Refugee Children with Cancer**

| <b>Type of Procedure</b>           |                              | <b>No of procedures</b> |
|------------------------------------|------------------------------|-------------------------|
| Chemotherapy (n=426)               | Neoadjuvant                  | 33                      |
|                                    | Adjuvant                     | 382                     |
|                                    | Palliative                   | 10                      |
|                                    | Unknown                      | 1                       |
| Surgery (n=198)                    | Curative/ Partial resection  | 17                      |
|                                    | Curative/ Complete resection | 74                      |
|                                    | Biopsy                       | 98                      |
|                                    | Palliative                   | 9                       |
| Radiotherapy (n=100)               | Therapeutic                  | 75                      |
|                                    | Palliative                   | 13                      |
|                                    | Prophylactic                 | 12                      |
| Bone marrow transplantation (n=16) | Allogeneic                   | 12                      |
|                                    | Autologous                   | 4                       |
| Solid organ transplantation (n=1)  | Liver                        | 1                       |
| <b>Total number of procedures</b>  |                              | <b>741</b>              |



## eTable 8. A brief history of legal arrangements for providing health care to Refugees in Turkey

---

- Provision of health services has started since the beginning of the first arrivals of Syrians on 29 April 2011. Regarding the health service provision in camps, as the responsible authority, Disaster and Emergency Management Presidency (AFAD) established field hospitals with doctors and nurses.
  - MoH Directive regarding “*Rules and Procedures for the Establishment, Closure and Operation of Temporary Health Facility*” dated 31 December 2012.
  - AFAD’s Circular regarding “*Health Services for Syrian Guests*” number 2013/1 dated 18 January 2013.
  - AFAD’s Circular regarding “*Health Services and Other Services for Syrian Guests*” with number 2013/18 dated 9 September 2013.
  - “Temporary Protection Regulation” announced on 22 October 2014 in the Turkey’s official gazette, issue 29153.
  - MoH Directive regarding “*Procedures for the Implementation of Health Services for Foreigners under Temporary Protection*” with number 2875 dated 25 March 2015.
  - MoH Directive Regarding the establishment of “*Migrant Health Centres/Units*” announced on 3 September 2015.
  - AFAD’s Circular regarding “*Implementation of Health Services for Foreigners under Temporary Protection*” with number 2015/8 dated 12 October 2015.
  - MoH Directive regarding “*Changes to the Procedures for the Implementation of Health Services for Foreigners under Temporary Protection*” with number 9648 dated 4 November 2015.
  - “*The SIHHAT Project*”, carried out jointly by the Ministry of Health and the European Union, aiming to increase the quality of health services, health infrastructure and qualification of professionals working with Syrians in Turkey was launched in 2017. Syrian health care workers were also allowed to work in Migrant Health Centers to provide health care services for Syrian refugees, after training by Ministry of Health.
-

**eFigure 1. The Participating Centers from Eight Cities in Southern Turkey**

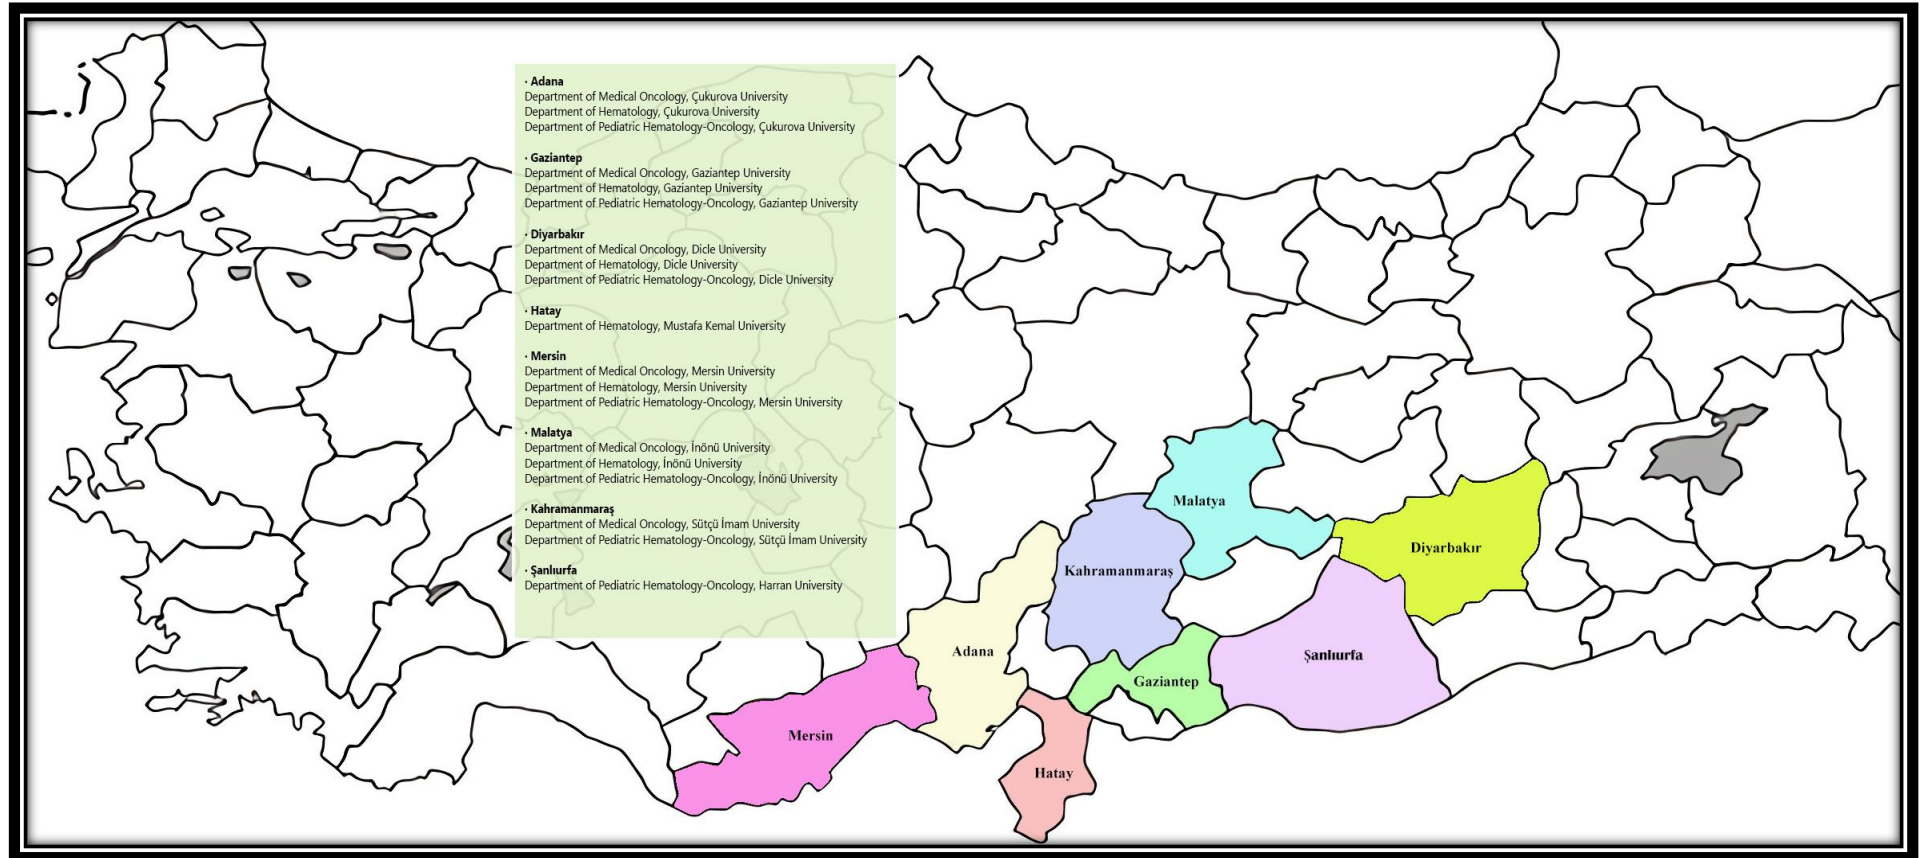

eFigure 2. The Phase-Specific Health-Related Risks & Problems of Forced Migration

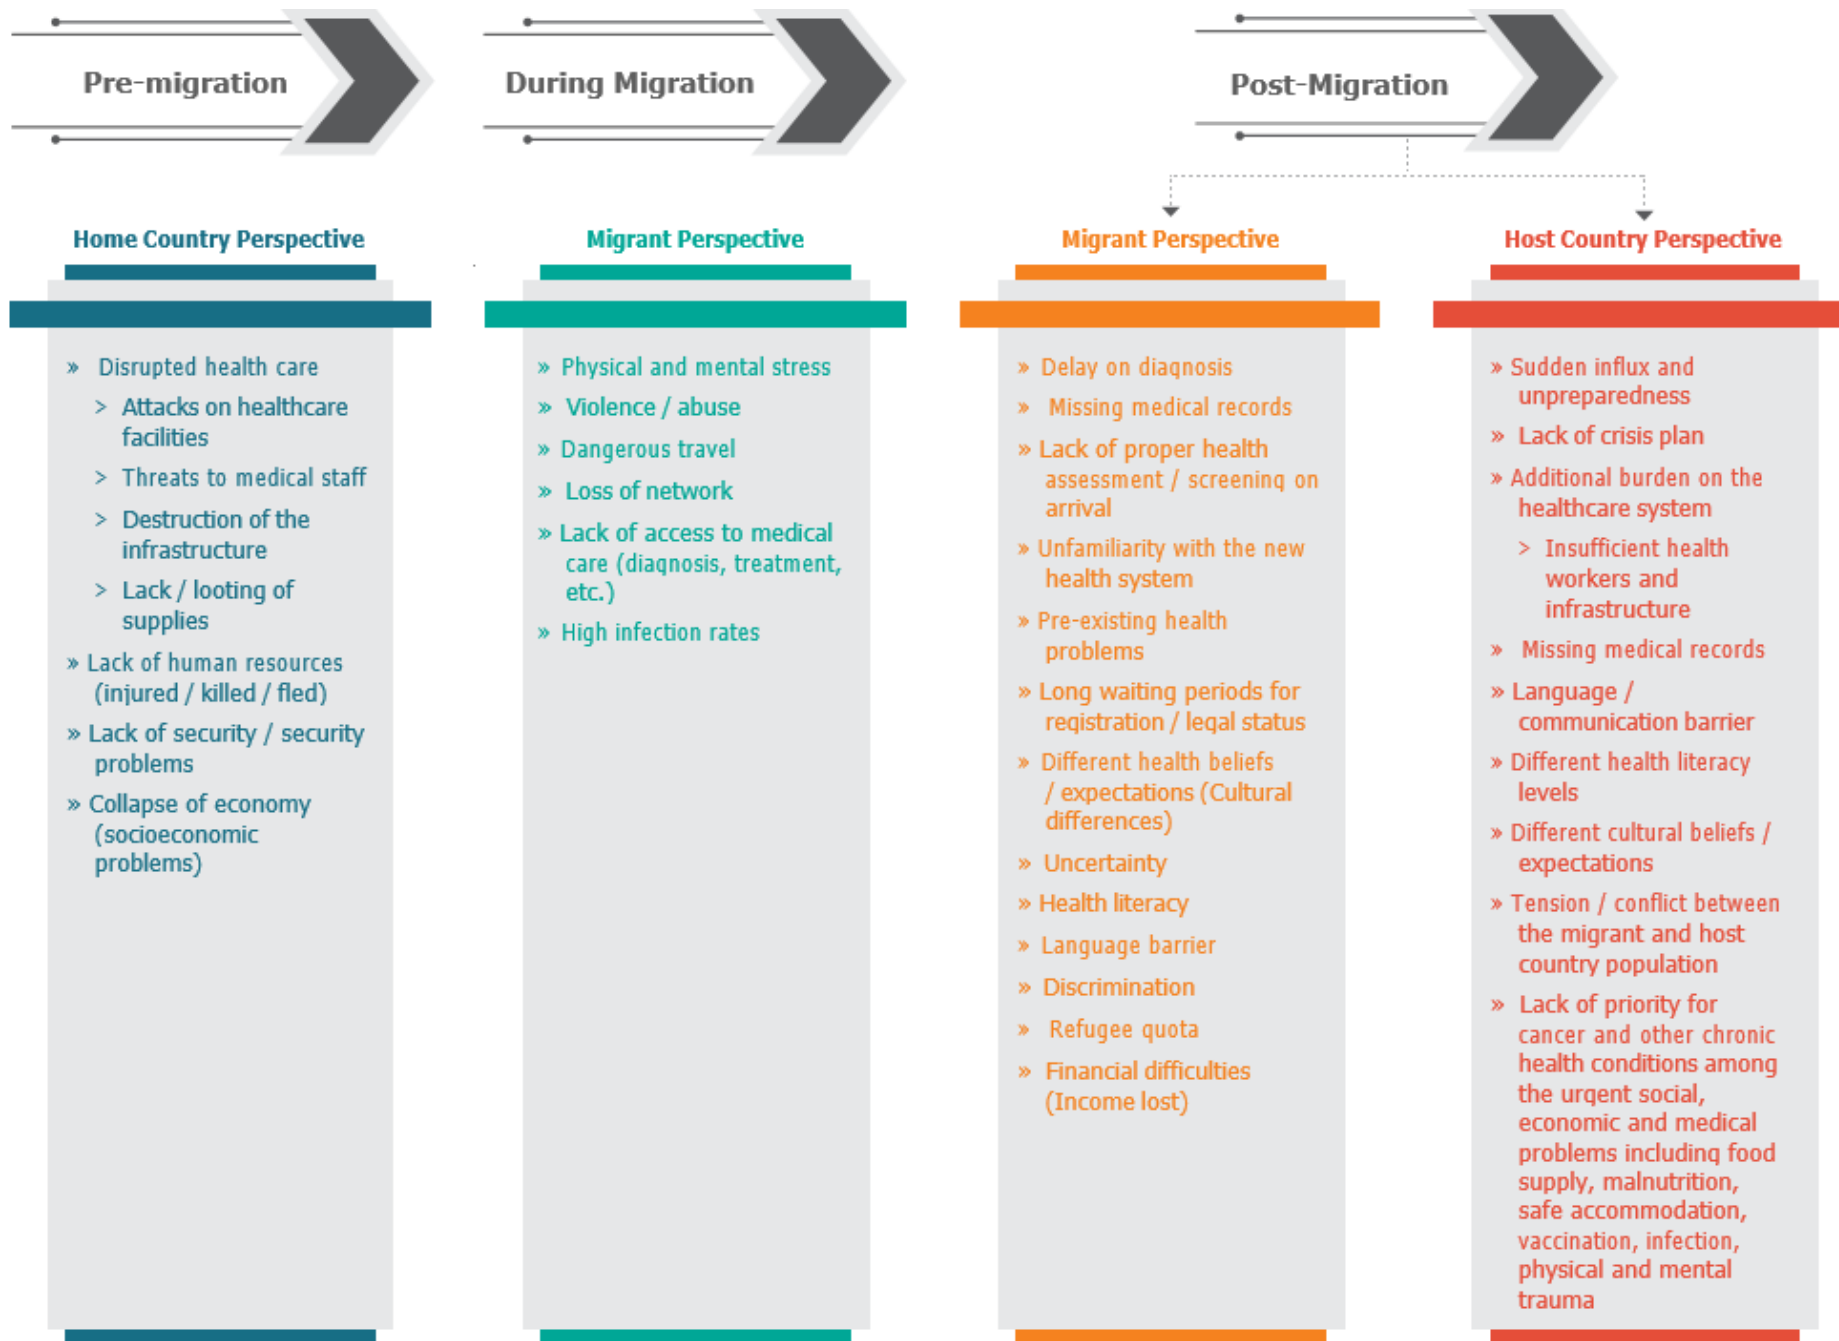

Supplement: jamanetwopen-e2312903-s001.pdf [file jamanetwopen-e2312903-s001.pdf]
