# Supplementary material for: Clinical Characteristics and Outcomes of Cancer Cases Among Syrian Refugees From Southern Turkey
Source: PubMed Central journal article supplement (PMC10208156; doi:10.1001/jamanetworkopen.2023.12903), 2023-05-23
Supplement: jamanetwopen-e2312903-s002.pdf [file jamanetwopen-e2312903-s002.pdf]

## Data Sharing Statement

Kutluk. Clinical Characteristics and Outcomes of Cancer Cases Among Syrian Refugees From Southern Turkey. *JAMA Netw Open*. Published May 23, 2023.

doi:10.1001/jamanetworkopen.2023.12903

### Data

**Data available:** No
